# Supplementary material for: Patients’ experiences and expectations of chiropractic care: a national cross-sectional survey
Source: PubMed Central journal article supplement (PMC4307916; doi:10.1186/s12998-014-0049-0), 2015-01-16
Supplement: 12998_2014_49_MOESM1_ESM.pdf [file 12998_2014_49_MOESM1_ESM.pdf]

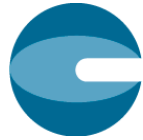

National Survey of Chiropractic Patients

Section A: Your Experience of Chiropractic Treatment

|    |                                                                                                   |                    |                               |    |   |   |                |
|----|---------------------------------------------------------------------------------------------------|--------------------|-------------------------------|----|---|---|----------------|
| 1. | Before you first had chiropractic treatment, how much did you know about: (please circle)         | I knew very little |                               |    |   |   | I knew a lot   |
| a. | What the treatment involved?                                                                      | 1                  | 2                             | 3  | 4 | 5 |                |
| b. | The likely benefits of the treatment?                                                             | 1                  | 2                             | 3  | 4 | 5 |                |
| c. | Possible reactions to the treatment?                                                              | 1                  | 2                             | 3  | 4 | 5 |                |
| 2. | Approximately how many chiropractic treatments have you had in the last 12 months?                |                    |                               |    |   |   |                |
| 3. | Are you currently receiving chiropractic treatment? (please circle)                               | Yes                |                               | No |   |   |                |
| 4. | If No, why did you stop chiropractic treatment? (tick all that apply)                             |                    |                               |    |   |   |                |
|    | The problem being treated improved/got better and I no longer need treatment                      |                    |                               |    |   |   |                |
|    | The problem being treated has improved and I am currently able to manage it myself                |                    |                               |    |   |   |                |
|    | I did not feel the treatment was benefiting me                                                    |                    |                               |    |   |   |                |
|    | I was unhappy with the chiropractor's approach/manner                                             |                    |                               |    |   |   |                |
|    | I had an unpleasant reaction to treatment                                                         |                    |                               |    |   |   |                |
|    | I was unhappy with the cost of treatment                                                          |                    |                               |    |   |   |                |
|    | I am currently unable to afford treatment                                                         |                    |                               |    |   |   |                |
|    | Other health problems have prevented me having chiropractic treatment                             |                    |                               |    |   |   |                |
|    | Other (please describe)                                                                           |                    |                               |    |   |   |                |
| 5. | For you, what have been the main benefits of chiropractic treatment? (tick all that apply)        |                    |                               |    |   |   |                |
|    | It has reduced or removed the pain I was experiencing                                             |                    |                               |    |   |   |                |
|    | It has increased my mobility/flexibility                                                          |                    |                               |    |   |   |                |
|    | It has enabled me to return to work, sport or other activities                                    |                    |                               |    |   |   |                |
|    | It has helped me maintain my general health and wellbeing                                         |                    |                               |    |   |   |                |
|    | It is helping to prevent or reduce future problems                                                |                    |                               |    |   |   |                |
|    | It has given me a better understanding of my health problem                                       |                    |                               |    |   |   |                |
|    | It has increased my ability/confidence to manage my health problem                                |                    |                               |    |   |   |                |
|    | Other (please describe)                                                                           |                    |                               |    |   |   |                |
| 6. | Have you ever had an unexpected or unpleasant reaction to chiropractic treatment? (please circle) | Yes                |                               | No |   |   |                |
| 7. | If Yes, which reaction/s have you experienced? (tick all that apply)                              |                    |                               |    |   |   |                |
|    | Tiredness or fatigue                                                                              |                    | Stiffness                     |    |   |   |                |
|    | Headache                                                                                          |                    | Dizziness or light headedness |    |   |   |                |
|    | Extra Pain and/or Radiating Pain                                                                  |                    | Nausea                        |    |   |   |                |
|    | Tingling/numbness in legs or arms                                                                 |                    | Other (please describe)       |    |   |   |                |
|    |                                                                                                   | Not concerned      |                               |    |   |   | Very concerned |
| 8. | How concerned were you by this reaction? (please circle)                                          | 1                  | 2                             | 3  | 4 | 5 |                |

|     |                                                     |     |    |
|-----|-----------------------------------------------------|-----|----|
| 9.  | Have you ever changed chiropractor? (please circle) | Yes | No |
| 10. | If Yes, what was the reason? (please describe)      |     |    |
|     |                                                     |     |    |

### Section B: Your experience of chiropractic care and treatment

For each question please circle Yes or No in **BOTH** the 'Expected?' and 'Did it happen?' columns

| <b>Before Seeing the Chiropractor</b> |                                                                                                                                     | Expected? |    | Did it happen? |    |
|---------------------------------------|-------------------------------------------------------------------------------------------------------------------------------------|-----------|----|----------------|----|
| 11.                                   | I expect to be given general information about chiropractic treatment and what it involves                                          | Yes       | No | Yes            | No |
| 12.                                   | I expect to be given general information about possible reactions (both positive and negative) to chiropractic treatment            | Yes       | No | Yes            | No |
| 13.                                   | I expect to be given information about what will happen at my first consultation                                                    | Yes       | No | Yes            | No |
| 14.                                   | I expect to be told about the cost of treatments                                                                                    | Yes       | No | Yes            | No |
| 15.                                   | I expect to be told how long the first consultation was likely to last                                                              | Yes       | No | Yes            | No |
| 16.                                   | I expect to fill-in and sign a consent form for the first consultation                                                              | Yes       | No | Yes            | No |
| 17.                                   | I expect to provide my General Practitioner's name and contact details                                                              | Yes       | No | Yes            | No |
| <b>At the First Consultation</b>      |                                                                                                                                     | Expected? |    | Did it happen? |    |
| 18.                                   | I expect to be given time to tell the chiropractor about my problem and how it was affecting me                                     | Yes       | No | Yes            | No |
| 19.                                   | I expect the chiropractor to take a detailed account of my personal case history                                                    | Yes       | No | Yes            | No |
| 20.                                   | I expect to be given a gown and/or towels to cover up if I had to undress                                                           | Yes       | No | Yes            | No |
| 21.                                   | I expect to be able to undress and dress in privacy                                                                                 | Yes       | No | Yes            | No |
| 22.                                   | I expect the chiropractor to explain why any further investigations (e.g. X-Rays) were necessary and any risks associated with them | Yes       | No | Yes            | No |
| 23.                                   | I expect the chiropractor to give me a diagnosis or rationale for my care                                                           | Yes       | No | Yes            | No |
| 24.                                   | I expect the chiropractor to explain what treatment I will need (e.g. the type, frequency and duration of treatment)                | Yes       | No | Yes            | No |
| 25.                                   | I expect the chiropractor to talk to me about any possible adverse reactions to the treatment                                       | Yes       | No | Yes            | No |
| 26.                                   | I expect the chiropractor to talk to me about the likely success of the treatment                                                   | Yes       | No | Yes            | No |
| 27.                                   | I expect the chiropractor to explain what the cost of the agreed treatment plan would be                                            | Yes       | No | Yes            | No |
| 28.                                   | I expect the chiropractor to give me time to ask questions about the proposed treatment plan                                        | Yes       | No | Yes            | No |

| <b>On-Going Treatment</b>                      |                                                                                                                                                                                                             | Expected? |    | Did it happen? |    |
|------------------------------------------------|-------------------------------------------------------------------------------------------------------------------------------------------------------------------------------------------------------------|-----------|----|----------------|----|
| 29.                                            | I expect to be given time to tell the chiropractor about how I felt after my last treatment, and discuss any problems or concerns                                                                           | Yes       | No | Yes            | No |
| 30.                                            | I expect the chiropractor to ask me if there has been any change in my condition, general health or medication                                                                                              | Yes       | No | Yes            | No |
| 31.                                            | I expect the chiropractor to allow sufficient time for the consultation                                                                                                                                     | Yes       | No | Yes            | No |
| 32.                                            | I expect the chiropractor to talk to me about further treatment options                                                                                                                                     | Yes       | No | Yes            | No |
| 33.                                            | I expect the chiropractor to allow me time to decide what I wish to do about future treatment                                                                                                               | Yes       | No | Yes            | No |
| 34.                                            | I expect the chiropractor to agree with me when my treatment should be reviewed                                                                                                                             | Yes       | No | Yes            | No |
| 35.                                            | I expect the chiropractor to give me advice about how I manage my problem/symptoms between treatments                                                                                                       | Yes       | No | Yes            | No |
| <b>Chiropractor's Knowledge and Experience</b> |                                                                                                                                                                                                             | Expected? |    | Did it happen? |    |
| 36.                                            | I expect that information about the chiropractor's qualifications and registration will be displayed in the clinic/available in leaflets/included on the practice website                                   | Yes       | No | Yes            | No |
| 37.                                            | I expect that information about the chiropractor's experience (e.g. length of time in practice) will be displayed in the clinic/available in leaflets/included on the practices website                     | Yes       | No | Yes            | No |
| 38.                                            | I expect that information about the chiropractor's special interests or additional skills (e.g. soft tissue massage) will be displayed in the clinic/available in leaflets/included on the practice website | Yes       | No | Yes            | No |
| 39.                                            | I expect that information about how the chiropractor is maintaining/improving their professional knowledge (e.g. further training) will be displayed in the clinic/included on the practice website         | Yes       | No | Yes            | No |
| 40.                                            | I expect that if my problem is not improving with chiropractic treatment and/or I have other health needs, the chiropractor will discuss referral to another healthcare practitioner                        | Yes       | No | Yes            | No |
| 41.                                            | I expect that, if necessary, and with my consent, the chiropractor will contact my GP                                                                                                                       | Yes       | No | Yes            | No |
| <b>Patient Feedback and Complaints</b>         |                                                                                                                                                                                                             | Expected? |    | Did it happen? |    |
| 42.                                            | I expect the chiropractic practice to have a clear system to enable me to provide confidential feedback (whether positive or negative)                                                                      | Yes       | No | Yes            | No |
| 43.                                            | I expect to be given information about the practice's complaints procedure                                                                                                                                  | Yes       | No | Yes            | No |
| 44.                                            | I expect to be told about my right to refer a complaint to the General Chiropractic Council and be given the GCC's contact details                                                                          | Yes       | No | Yes            | No |
| Further comments                               |                                                                                                                                                                                                             |           |    |                |    |

### Section C: Assuring Chiropractors are 'Fit to Practise'

| We are interested in what would reassure you that your chiropractor is keeping their knowledge and skills up to date. Please indicate your level of agreement with the following statements |                                                                                                                                       | Strongly disagree |   |   |   | Strongly agree |
|---------------------------------------------------------------------------------------------------------------------------------------------------------------------------------------------|---------------------------------------------------------------------------------------------------------------------------------------|-------------------|---|---|---|----------------|
| 45.                                                                                                                                                                                         | The chiropractor should provide patients with up to date information about their on-going training and development                    | 1                 | 2 | 3 | 4 | 5              |
| 46.                                                                                                                                                                                         | The chiropractor should review their practise regularly (e.g. every 3 years) with support from another experienced chiropractor       | 1                 | 2 | 3 | 4 | 5              |
| 47.                                                                                                                                                                                         | The chiropractor should be reassessed regularly (e.g. every 3 years) by an independent assessor to ensure they are keeping up to date | 1                 | 2 | 3 | 4 | 5              |
| 48.                                                                                                                                                                                         | The chiropractor should have a system for gathering patient feedback and patients should be able to see the feedback recorded         | 1                 | 2 | 3 | 4 | 5              |
| 49.                                                                                                                                                                                         | There should be a national system for gathering patient feedback and patients should be able to see the feedback recorded             | 1                 | 2 | 3 | 4 | 5              |
| Further comments:                                                                                                                                                                           |                                                                                                                                       |                   |   |   |   |                |

### Section D: About You

|     |                                                                                 |                                                                                                                        |                        |
|-----|---------------------------------------------------------------------------------|------------------------------------------------------------------------------------------------------------------------|------------------------|
| 50. | Are you?                                                                        | Male                                                                                                                   | Female                 |
| 51. | What is your age?                                                               |                                                                                                                        |                        |
| 52. | What is your ethnicity? (please circle or tick one)                             |                                                                                                                        |                        |
|     | White                                                                           | Black or Black British                                                                                                 | Asian or Asian British |
|     | Chinese or Chinese British                                                      | Mixed heritage                                                                                                         | other ethnic group     |
| 53. | Do you consider yourself to have a disability?                                  | Yes                                                                                                                    | No                     |
| 54. | What is your highest level of academic education/attainment? (please tick)      |                                                                                                                        |                        |
|     | No academic qualifications                                                      | GCSE or equivalent (e.g. O Level, CSE, NVQ1)                                                                           |                        |
|     | A levels or equivalent (e.g. NVQ 2-3, BTEC certificate, City and Guilds crafts) | BA or BSc degree or equivalent (e.g. NVQ 4, BTEC diploma, City and Guilds level 3+, nursing or teaching qualification) |                        |
|     | Masters Degree, PhD, Post graduate certificate or NVQ 5                         | Other (please give details)                                                                                            |                        |
| 55. | How would you describe the area you live in? (please circle or tick one)        |                                                                                                                        |                        |
|     | City/Urban area                                                                 | Town or suburb                                                                                                         | Village/Rural area     |
| 56. | Which of the four UK nations do you live in? (please circle or tick one)        |                                                                                                                        |                        |
|     | England                                                                         | Scotland                                                                                                               | Wales                  |
|     |                                                                                 |                                                                                                                        | Northern Ireland       |

**Many thanks. Please return in the freepost envelope provided**
